# Supplementary material
Source: Springer Nature journal article supplement (https://www.springermedizin.de/resource/supplementary/12931_2010_1044_MOESM5_ESM.pdf/9425512)

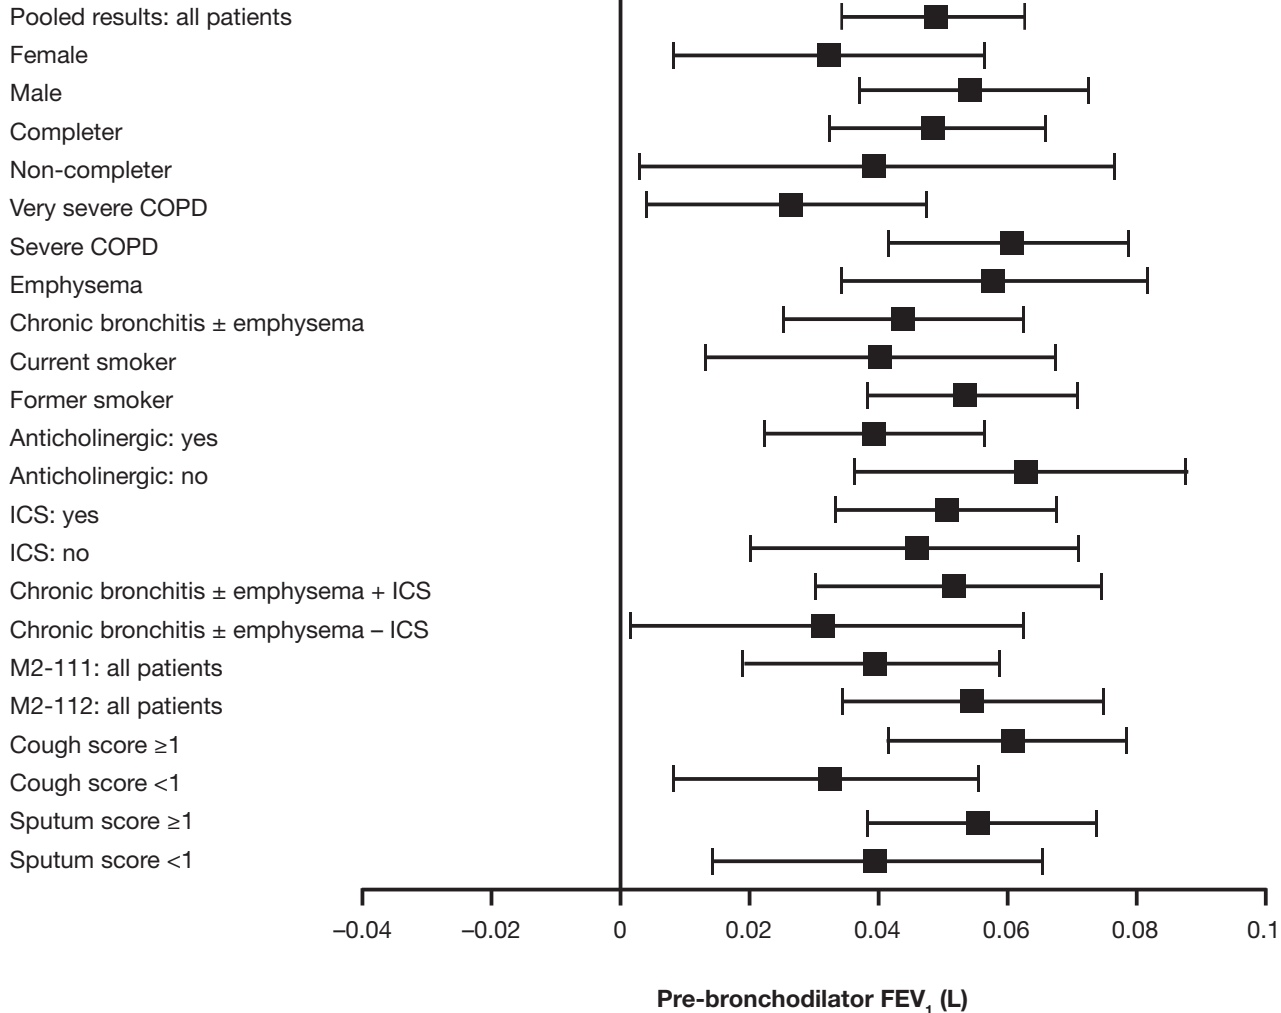

Supplement: MOESM5 [file 9425512]
